# Supplementary material for: Mycoprotein Production by Submerged Fermentation of the Edible Mushroom Pleurotus ostreatus in a Batch Stirred Tank Bioreactor Using Agro-Industrial Hydrolysate
Source: MDPI journal article supplement (doi:10.3390/foods12122295), 2023-06-07
Supplement: s1 [file s1]

## Mycoprotein production by submerged fermentation of the edible mushroom *Pleurotus ostreatus* in a batch stirred tank bioreactor using agro-industrial hydrolysate

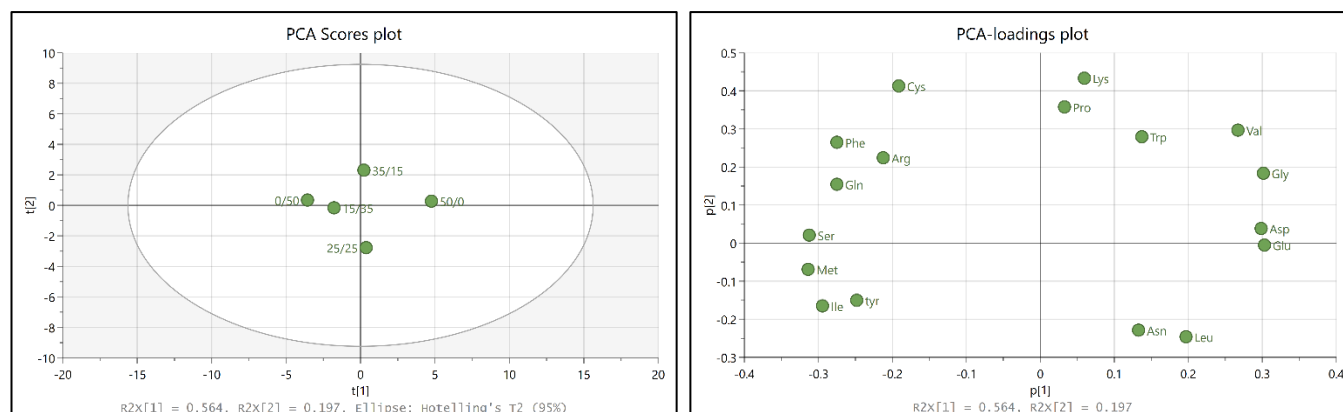

**Figure. S1** PCA Analysis plots for amino acid composition on different glucose/xylose mixtures depicting the corresponding loading (on the right) and scores (on the left) plots that establish the relative importance of each variable (amino acids concentrations). 50/0 is 50G0X, 0/50 is 0G50X, 35/15 is 35G15X, 25/25 is 25G25X
